# Supplementary material
Source: Research Square preprint supplement (doi:10.21203/rs.3.rs-9472761/v1)
Supplement: Supplementary file 1 [file 157247029787c4728fe27e62.xlsx]

## Sheet: Table S1
Peptide sequence with modifications	SwissProt IDs	Gene names
YNINPVSM(+15,99)DIC(+25,00)K	Q9UDR5	AASS
TM(+15,99)GC(+25,00)LATTHSK	P80404	ABAT
TMGC(+25,00)LATTHSK	P80404	ABAT
GALVAVVGPVGC(+25,00)GK	O15438	ABCC3
DVNLRPEQLGDIC(+25,00)VGNVLQPGAGAIMAR	P09110	ACAA1
IVGYFVSGC(+25,00)DPSIM(+15,99)GIGPVPAISGALK	P42765	ACAA2
IVGYFVSGC(+25,00)DPSIMGIGPVPAISGALKK	P42765	ACAA2
LASGEHIAAFC(+25,00)LTEPASGSDAASIR	Q9H845	ACAD9
C(+25,00)IGAIAM(+15,99)TEPGAGSDLQGIK	P28330	ACADL
QAVLGAGLPISTPC(+25,00)TTINK	P24752	ACAT1
QGEYGLASIC(+25,00)NGGGGASAM(+15,99)LIQK	P24752	ACAT1
QGEYGLASIC(+25,00)NGGGGASAM(+15,99)LIQKL	P24752	ACAT1
C(+25,00)GVEVTSMK	P33121	ACSL1
ELSENSQQAANILSGAC(+25,00)GLQR	Q68CK6	ACSM2B
(+42,01)DDDIAALVVDNGSGM(+15,99)C(+25,00)K	P60709	ACTB
C(+25,00)DVDIRK	P60709; P63261	ACTB; ACTG1
LC(+25,00)YVALDFEQEM(+15,99)ATAASSSSLEK	P60709; P63261	ACTB; ACTG1
(+42,01)EEEIAALVIDNGSGM(+15,99)C(+25,00)K	P63261	ACTG1
DGLALC(+25,00)ALIHR	Q08043	ACTN3
M(+15,99)VAVGIC(+25,00)GTDDHVVSGTM(+15,99)VTPLPVILGHEAAGIVESVGEGVTTVKPGDK	P07327	ADH1A
IDAASPLEKVC(+25,00)LIGC(+25,00)GFSTGYGSAVNVAK	P00325	ADH1B
VIPLFTPQC(+25,00)GK	P00325	ADH1B
VC(+25,00)LIGC(+25,00)GFSTGYGSAVNVAK	P00325; P07327	ADH1B; ADH1A
AAIAWEAGKPLC(+25,00)IEEVEVAPPK	P08319	ADH4
PLC(+25,00)IEEVEVAPPK	P08319	ADH4
SIYHFGNTSTFC(+25,00)EYTVIK	P28332	ADH6
VGADNHVLPLDC(+25,00)VTLQTFLAK	P35573	AGL
C(+25,00)LLLVDSVASLGGTPLYMDR	P21549	AGXT
QAQYLGM(+15,99)SC(+25,00)DGPFKPDHYR	P23526	AHCY
QAQYLGM(+15,99)SC(+25,00)DGPFKPDHYRY	P23526	AHCY
C(+25,00)LIATGGTPR	O95831	AIFM1
REDIFYC(+25,00)GK	P51857	AKR1D1
C(+25,00)VLIFGVPSR	P13716	ALAD
LC(+25,00)TVATLR	P02768	ALB
LVRPEVDVM(+15,99)C(+25,00)TAFHDNEETFLK	P02768	ALB
LVRPEVDVM(+15,99)C(+25,00)TAFHDNEETFLKK	P02768	ALB
LVRPEVDVMC(+25,00)TAFHDNEETFLK	P02768	ALB
QNC(+25,00)ELFEQLGEYKFQNALLVR	P02768	ALB
SHC(+25,00)IAEVENDEM(+15,99)PADLPSLAADFVESK	P02768	ALB
SHC(+25,00)IAEVENDEMPADLPSLAADFVESK	P02768	ALB
YIC(+25,00)ENQDSISSK	P02768	ALB
C(+25,00)M(+15,99)ALSTAVLVGEAK	Q02252	ALDH6A1
C(+25,00)M(+15,99)ALSTAVLVGEAKK	Q02252	ALDH6A1
SPLIIFSDC(+25,00)DM(+15,99)NNAVK	P49189	ALDH9A1
ALNDHHVYLEGTLLKPNM(+15,99)VTAGHAC(+25,00)TK	P05062	ALDOB
TVPAAVPGIC(+25,00)FLSGGMSEEDATLNLNAINLCPLPK	P05062	ALDOB
ADLVISHAGAGSC(+25,00)LETLEK	Q9NP73	ALG13
C(+25,00)GVPFTDLLDAAK	Q01433	AMPD2
C(+25,00)LIEILASR	P08133	ANXA6
GFGFPQAALITESC(+25,00)ITEVAAK	Q06278	AOX1
C(+25,00)PFPSRPDNGFVNYPAKPTLYYK	P02749	APOH
STC(+25,00)YAC(+25,00)RLFQTNTELLELTTK	Q8NB49	ATP11C
SHIM(+15,99)PAEFSSC(+25,00)PLNSDEEVNK	Q9H0W9	BKGD
FC(+25,00)GQLGSPLGNPPGKK	P00736	C1R
GC(+25,00)GEQTM(+15,99)IYLAPTLAASR	P0C0L4	C4A
QM(+15,99)EKDETVSDC(+25,00)SPHIANIGR	P47756	CAPZB
DGPM(+15,99)C(+25,00)M(+15,99)QDNQGGAPNYYPNSFGAPEQQPSALEHSIQYSGEVRR	P04040	CAT
SC(+25,00)SPELQQK	P16152	CBR1
TKTEDMVSQLHTNLLGSM(+15,99)LTC(+25,00)K	Q8N4T8	CBR4
QLC(+25,00)DNAGFDATNILNK	Q99832	CCT7
TFHETLDC(+25,00)C(+25,00)GSSTLTALTTSVLK	P60033	CD81
ITC(+25,00)TEEGWSPTPK	Q03591	CFHR1
GDSIDQC(+25,00)ALIQSIK	P12111	COL6A3
GNRGDSIDQC(+25,00)ALIQSIK	P12111	COL6A3
KGTVLLADNVIC(+25,00)PGAPDFLAHVR	P21964	COMT
KC(+25,00)EPIIMTVPR	Q9ULV4	CORO1C
AEQPDGLILGMGGQTALNC(+25,00)GVELFK	P31327	CPS1
AEQPDGLILGMGGQTALNC(+25,00)GVELFKR	P31327	CPS1
C(+25,00)LGLTEAQTR	P31327	CPS1
ILDIYHQEAC(+25,00)GGC(+25,00)IISVGGQIPNNLAVPLYK	P31327	CPS1
M(+15,99)C(+25,00)HPSIEGFTPR	P31327	CPS1
SAYALGGLGSGIC(+25,00)PNRETLM(+15,99)DLSTK	P31327	CPS1
SAYALGGLGSGIC(+25,00)PNRETLMDLSTK	P31327	CPS1
GLGLSPDLVVC(+25,00)R	P17812	CTPS1
GTDEC(+25,00)AIESIAVAATPIPK	P53634	CTSC
TEDLGC(+25,00)M(+15,99)YK	Q13618	CUL3
DLDTTPVVNGFASVPPFYQLC(+25,00)FIPV	P33261	CYP2C19
SIEDRVQEEAHC(+25,00)LVEELRK	P10632	CYP2C8
EGADVIVNC(+25,00)TGVWAGALQR	P14920	DAO
IHLVPC(+25,00)HLR	P20711	DDC
VHAIQC(+25,00)DVRDPDM(+15,99)VQNTVSELIK	Q16698	DECR1
DPRTAPSSSC(+25,00)TAVASAASR	Q9BTC0	DIDO1
QGFSYQC(+25,00)PQGQVIVAVR	Q07507	DPT
THHQAVNFNIFEGMVC(+25,00)HGVPLVTISR	Q14117	DPYS
C(+25,00)STPEEIK	P60981	DSTN
ALNALC(+25,00)DGLIDELNQALK	P30084	ECHS1
NNTVGLIQLNRPKALNALC(+25,00)DGLIDELNQALK	P30084	ECHS1
QATEGPC(+25,00)NM(+15,99)PKPGVFDLINK	O75521	ECI2
YVEPIEDVPC(+25,00)GNIVGLVGVDQFLVK	P13639	EEF2
C(+25,00)M(+15,99)IDQAHQEERPIR	Q9UBQ5	EIF3K
NHGLSDEHVFEVIC(+25,00)PSIPGYGFSEASSK	P07099	EPHX1
QAIDDDC(+25,00)NQTGQM(+15,99)TAGFLDWPQGTFASQVTLEGDK	P38117	ETFB
C(+25,00)AFISQASATM(+15,99)HLPATIGDYTDFYSSR	P16930	FAH
C(+25,00)VLLSNLSSTSHVPEVDPGSAELQK	P49327	FASN
TNISHNGTYHC(+25,00)SGMGK	P12314	FCGR1A
C(+25,00)AGC(+25,00)TNPISGLGGTK	Q14192	FHL2
VIEGLDTGLQGMC(+25,00)VGER	Q96AY3	FKBP10
EPGEYAVHIM(+15,99)C(+25,00)DDEDIKDSPYM(+15,99)AFIHPATGGYNPDLVR	O75369	FLNB
KEPVFNDELPASILC(+25,00)GIVSVK	P31513	FMO3
VGKDELFALEQSC(+25,00)AQVVLQAANER	Q16658	FSCN1
VPTANVSVVDLTC(+25,00)RLEK	P04406	GAPDH
LLEGDGGPNTGGM(+15,99)GAYC(+25,00)PAPQVSNDLLLK	P22102	GART
FSLSC(+25,00)SETLM(+15,99)GELGNIAK	Q9Y2T3	GDA
NTNDANSC(+25,00)QIIIPQNQVNR	P50395	GDI2
QLIC(+25,00)DPSYVK	P50395	GDI2
C(+25,00)HPQTIAVVQTR	P23378	GLDC
SYIGM(+15,99)GYYNC(+25,00)SVPQTILR	P23378	GLDC
AKPYEGSILEADC(+25,00)DILIPAASEK	P00367	GLUD1
C(+25,00)AVVDVPFGGAK	P00367; P49448	GLUD1; GLUD2
AKPYEGSILEVDC(+25,00)DILIPAATEK	P49448	GLUD2
IIKPC(+25,00)NHVLSLSFPIR	P49448; P00367	GLUD2; GLUD1
C(+25,00)LDAFPNLK	P09488	GSTM1
SAVLISSKPGC(+25,00)FIAGADINMLAACK	P40939	HADHA
EGGQYGLVAAC(+25,00)AAGGQGHAM(+15,99)IVEAYPK	P55084	HADHB
GTFATLSELHC(+25,00)DK	P68871	HBB
C(+25,00)FYNSDGDFLIVPQK	Q93099	HGD
GC(+25,00)TGVITLNRPK	Q6NVY1	HIBCH
VQAQYPGVC(+25,00)INNEVVEPSAEQIAK	P50135	HNMT
LTDC(+25,00)VVMRDPASKR	P22626	HNRNPA2B1
SPVGVQPILNEHTFC(+25,00)VGM(+15,99)SK	P00739	HPR
SPVGVQPILNEHTFC(+25,00)VGMSK	P00739	HPR
C(+25,00)LELFTELAEDK	P07900	HSP90AA1
ARFEELC(+25,00)SDLFR	P0DMV8; P0DMV9	HSPA1A; HSPA1B
C(+25,00)NEIINWLDK	P11142	HSPA8
C(+25,00)EFQDAYVLLSEK	P10809	HSPD1
C(+25,00)IPALDSLTPANEDQK	P10809	HSPD1
GQKC(+25,00)EFQDAYVLLSEK	P10809	HSPD1
GTGLVHTAPAHGM(+15,99)EDYGVASQHNLPM(+15,99)DC(+25,00)LVDEDGVFTDVAGPELQNK	Q9NSE4	IARS2
C(+25,00)ATITPDEK	O75874	IDH1
C(+25,00)ATITPDEAR	P48735	IDH2
C(+25,00)ATITPDEARVEEFK	P48735	IDH2
VVLAC(+25,00)SALK	Q5T6J7	IDNK
NQVSLTC(+25,00)LVK	P01857; P01859; P01860	IGHG1; IGHG2; IGHG3
C(+25,00)PAPELLGGPSVFLFPPKPK	P01857; P01860	IGHG1; IGHG3
KC(+25,00)C(+25,00)VEC(+25,00)PPC(+25,00)PAPPVAGPSVFLFPPK	P01859	IGHG2
KC(+25,00)C(+25,00)VEC(+25,00)PPC(+25,00)PAPPVAGPSVFLFPPKPK	P01859	IGHG2
C(+25,00)LEENQELR	Q9Y6K9	IKBKG
VDSSENLC(+25,00)TENILFK	O95760	IL33
SDAAVLTIPAC(+25,00)DFQATHPVM(+15,99)DLK	P40189	IL6ST
APAALPALC(+25,00)DLLASAADPQIR	Q8TEX9	IPO4
VC(+25,00)DIAAELAR	O00410	IPO5
GFSC(+25,00)GSAIVGGGK	P19013	KRT4
QEIEC(+25,00)QNQEYSLLLSIK	P35527	KRT9
LNLPINIIGLAPLC(+25,00)ENMPSGK	P28838	LAP3
C(+25,00)LAQEVNIPDWIVDLR	Q9Y4W2	LAS1L
(+42,01)SC(+25,00)QQSQQQC(+25,00)QPPPK	Q5T754	LCE1F
DDVFLSVPC(+25,00)ILGQNGISDLVK	P00338	LDHA
KAYC(+25,00)EPC(+25,00)YINTLEQC(+25,00)NVC(+25,00)SKPIMER	Q93052	LPP
GGDPHSC(+25,00)KAVTDEEPFLIFANR	Q07954	LRP1
GGEC(+25,00)ASPLPGLR	Q8N2S1	LTBP4
DLLVENVPYC(+25,00)DAPTQKQ	Q5U5X0	LYRM7
SRLEAMNQC(+25,00)WESVLQK	Q9UPN3	MACF1
ILGLGDLGC(+25,00)NGM(+15,99)GIPVGK	P48163	ME1
KVFANPEDC(+25,00)VAFGK	P10620	MGST1
VGADLSHVFC(+25,00)ASAAAPVIK	Q8IW45	NAXD
M(+15,99)ADC(+25,00)GGLPQISQPAK	Q92597	NDRG1
C(+25,00)SLHSASPASVR	Q9P206	NHSL3
EVC(+25,00)EEAGVK	O95989	NUDT3
SNGLGPVM(+15,99)SGNTAYPVISC(+25,00)PPLTPDWGVQDVWSSLR	P22234	PAICS
C(+25,00)LAAEDVVFIGPDTHAIQAMGDKIESK	P05165	PCCA
QC(+25,00)PIM(+15,99)DPAWEAPEGVPIDAIIFGGR	Q16822	PCK2
GQGTIC(+25,00)WVDCGDAESRK	Q14554	PDIA5
GHFFVEDQIYC(+25,00)EK	O00151	PDLIM1
C(+25,00)DEPILSNR	P30086	PEBP1
TYSHLNIAGLVGSIDNDFC(+25,00)GTDM(+15,99)TIGTDSALHR	P17858	PFKL
SAVENC(+25,00)QDSWR	P52209	PGD
NAGNC(+25,00)LSPAVIVGLLK	O43175	PHGDH
QNLSKEELIAELQDC(+25,00)EGLIVR	O43175	PHGDH
HRPQVAIIC(+25,00)GSGLGGLTDK	P00491	PNP
LC(+25,00)YVALDFEQEM(+15,99)ATVASSSSLEK	A5A3E0	POTEF
HTGPGILSM(+15,99)ANAGPNTNGSQFFIC(+25,00)TAK	P62937	PPIA
HTGPGILSMANAGPNTNGSQFFIC(+25,00)TAK	P62937	PPIA
C(+25,00)PSPPM(+15,99)INLISVGGQHQGVFGLPR	P50897	PPT1
HGEVC(+25,00)PAGWKPGSETIIPDPAGK	Q13162	PRDX4
FNNYVDC(+25,00)M(+15,99)K	P78527	PRKDC
NC(+25,00)ISTVVHQGLIR	P78527	PRKDC
GAVLVC(+25,00)DM(+15,99)SSNFLSKPVDVSK	Q9Y617	PSAT1
QPPWC(+25,00)DPLGPFVVGGEDLDPFGPR	Q92530	PSMF1
DIAEPHIPC(+25,00)LM(+15,99)PEYFEPQIK	Q96EY7	PTCD3
DIDDDLEGEVTEEC(+25,00)GK	Q9UHX1	PUF60
SILPTVGC(+25,00)AFFTK	Q9H0T7	RAB17
C(+25,00)VVVGDGAVGK	P63000	RAC1
MQAIKC(+25,00)VVVGDGAVGK	P63000	RAC1
QVEVDAQQC(+25,00)M(+15,99)LEILDTAGTEQFTAMR	P61224	RAP1B
VAC(+25,00)ITEQVLTLVNK	P04843	RPN1
LTAEFEEAQTSAC(+25,00)RLQEELEK	Q9P2E9	RRBP1
KADC(+25,00)TITM(+15,99)ADSDFLALMTGK	P22307	SCP2
QLIQGGVAEC(+25,00)VLALGFEK	P22307	SCP2
AGDKPHM(+15,99)QTYEVDLNKC(+25,00)GPMVLDALIK	P21912	SDHB
AGDKPHMQTYEVDLNKC(+25,00)GPM(+15,99)VLDALIK	P21912	SDHB
C(+25,00)GPMVLDALIK	P21912	SDHB
GQIPPLVTTDC(+25,00)M(+15,99)IQDQGNASPR	O94855	SEC24D
C(+25,00)MHLIQQGAR	Q9HD40	SEPSECS
VYQHQVVANC(+25,00)RALSEALTELGYK	P34896	SHMT1
C(+25,00)LLQIQASSGESK	O43772	SLC25A20
LQTQPPSLPGQPPMYSGTFDC(+25,00)FRK	O43772	SLC25A20
VLHEAEGHIVTC(+25,00)ETNTGEVYR	P62318	SNRPD3
SVC(+25,00)PGGSSPGSSSGGGR	Q53LP3	SOWAHC
SGGSGGC(+25,00)SGAGGASNCGTGSGR	Q15005	SPCS2
M(+15,99)EENLSEPVHC(+25,00)VSLNEIR	P02549	SPTA1
VQNVC(+25,00)AQGEDILNK	P02549	SPTA1
LVQYLREC(+25,00)EDVM(+15,99)DWINDK	Q13813	SPTAN1
DIPDYLC(+25,00)GK	Q9UNE7	STUB1
DQELYFFHELSPGSC(+25,00)FFLPK	P26639	TARS1
AC(+25,00)QGQYETIER	Q9BXI6	TBC1D10A
C(+25,00)LGIPTR	P21980	TGM2
LVAEVSLQNPLPVALEGC(+25,00)TFTVEGAGLTEEQK	P21980	TGM2
VVSGMVNC(+25,00)NDDQGVLLGR	P21980	TGM2
AQEAC(+25,00)GPLEM(+15,99)DSALSVVQNLEK	Q9Y490	TLN1
MVAAATNNLC(+25,00)EAANAAVQGHASQEK	Q9Y490	TLN1
VTC(+25,00)IDPNPNFEK	Q9H8H3	TMT1A
C(+25,00)GIGQEEM(+15,99)EASSSQDQSK	Q9C0C2	TNKS1BP1
ESESC(+25,00)DC(+25,00)LQGFQLTHSLGGGTGSGMGTLLISK	Q13885	TUBB2A
EIVHIQAGQC(+25,00)GNQIGTK	Q9BUF5	TUBB6
MREIVHIQAGQC(+25,00)GNQIGTK	Q9BUF5	TUBB6
IENLC(+25,00)AM(+15,99)GFDR	P61086	UBE2K
C(+25,00)EFVMEVTNK	Q16851	UGP2
DSAM(+15,99)LLSGC(+25,00)SHLLHNK	P22309	UGT1A1
AFITHAGSHGVYESIC(+25,00)NGVPM(+15,99)VM(+15,99)MPLFGDQMDNAK	O60656; P22309	UGT1A9; UGT1A1
SLEEC(+25,00)LEK	Q9UBR1	UPB1
LADDVDLEQVANETHGHVGADLAALC(+25,00)SEAALQAIR	P55072	VCP
C(+25,00)M(+15,99)LDRDEDMLITGGR	P47989	XDH
LTTVC(+25,00)PTVKPQTQGLAK	P07947	YES1
GHGLFC(+25,00)DVTVIVEDR	Q86T24	ZBTB33
PTASPSSIAANNC(+25,00)TVNTSSVATSSM(+15,99)K	Q96KR1	ZFR
